# Supplementary material
Source: PubMed Central journal article supplement (PMC5328573)
Supplement: AAC.02035-16_zac003175969s1.pdf [file AAC.02035-16_zac003175969s1.pdf]

1 **Supplemental Materials**

2

3 Table S1 Multi Locus Sequence Typing of the *mcr-1*-positive *Escherichia coli* isolates

| Isolates | Alleles    |             |             |            |            |             |             | ST      |
|----------|------------|-------------|-------------|------------|------------|-------------|-------------|---------|
|          | <i>adk</i> | <i>fumC</i> | <i>gyrB</i> | <i>icd</i> | <i>mdh</i> | <i>purA</i> | <i>recA</i> |         |
| C1       | 10         | 11          | 4           | 8          | 7          | 242         | 2           | ST2462  |
| C2       | 46         | 26          | 208         | 6          | 5          | 16          | 4           | ST2732  |
| C3       | 603        | 4           | 14          | 16         | 24         | 8           | 14          | Unknown |
| C4       | 8          | 11          | 4           | 8          | 8          | 8           | 2           | ST685   |
| C5       | 64         | 11          | 5           | 8          | 8          | 8           | 2           | ST202   |
| C6       | 6          | 266         | 83          | 24         | 1          | 1           | 2           | ST2847  |
| P1       | 6          | 11          | 4           | 8          | 8          | 8           | 2           | ST48    |
| P2       | 64         | 7           | 1           | 8          | 8          | 8           | 6           | ST871   |
| P3       | 9          | 175         | 33          | 131        | 24         | 8           | 7           | ST877   |
| P4       | 10         | 11          | 4           | 8          | 8          | 8           | 2           | ST10    |
| P5       | 6          | 4           | 12          | 1          | 20         | 18          | 7           | ST410   |
| P6       | 10         | 11          | 4           | 1          | 8          | 8           | 2           | ST34    |
| P7       | 10         | 11          | 4           | 1          | 8          | 8           | 2           | ST34    |

4

5

6

7

8

9

10

11

12

13

14

15

16

Table S2 Antibiotic Susceptibility Results of Strain P3

| Antibiotic(s)                 | MIC(s) ( $\mu\text{g/mL}$ ) | R/I/S <sup>a</sup> |
|-------------------------------|-----------------------------|--------------------|
| Ampicillin                    | >512                        | R                  |
| Amoxicillin-Clavulanic acid   | 16/8                        | I                  |
| Ceftazidime                   | 0.5                         | S                  |
| Ceftiofur                     | 0.5                         | S                  |
| Colistin                      | 32                          | R                  |
| Doxycycline                   | 16                          | R                  |
| Enrofloxacin                  | 0.25                        | S                  |
| Florfenicol                   | 128                         | R                  |
| Gentamicin                    | 4                           | S                  |
| Meropenem                     | $\leq 0.03$                 | S                  |
| Ofloxacin                     | 1                           | S                  |
| Spectinomycin                 | 16                          | S                  |
| Tetracycline                  | 64                          | R                  |
| Trimethoprim-Sulfamethoxazole | 0.12/2.4                    | S                  |

17 <sup>a</sup> R, resistant; I, intermediate, S, susceptible.

18

19

20

Table S3 PacBio Sequencing Metrics of pMCR-1-P3

| Matrix                  | Pre-Filter  | Post-Filter |
|-------------------------|-------------|-------------|
| Polymerase Reads Bases  | 671,896,526 | 594,400,801 |
| Polymerase Reads        | 150,292     | 50,843      |
| Polymerase Read N50     | 15,843      | 16,170      |
| Polymerase Read Length  | 4,470       | 11,690      |
| Polymerase Read Quality | 0.292       | 0.826       |

21

22

23

24

25

26

Table S4 Details of phage-related genes in plasmid pMCR-1-P3

| Start | Stop  | Annotation                                                         |
|-------|-------|--------------------------------------------------------------------|
| 3626  | 5332  | phage protein                                                      |
| 5393  | 6982  | sheath structural protein                                          |
| 6992  | 7804  | baseplate or tail tube                                             |
| 7957  | 8421  | putative morphogenetic function                                    |
| 8433  | 8942  | <i>bplB</i>                                                        |
| 10563 | 10408 | <i>mokW</i> protein                                                |
| 11886 | 11041 | <i>repL</i> protein                                                |
| 12716 | 11916 | <i>kilA</i>                                                        |
| 13923 | 12880 | <i>kilA</i> protein                                                |
| 15899 | 16465 | <i>pmgC</i>                                                        |
| 16476 | 17087 | <i>tub</i>                                                         |
| 17102 | 17983 | <i>pmgB</i>                                                        |
| 18065 | 21487 | phage protein inside capsid D                                      |
| 21487 | 21843 | <i>pep44b</i>                                                      |
| 21840 | 23273 | phage baseplate wedge tail fiber connector (T4-like <i>gp9</i> )   |
| 23273 | 24109 | phage protein                                                      |
| 24188 | 24622 | gpR                                                                |
| 24634 | 27273 | phage tail fiber protein                                           |
| 27276 | 27809 | phage tail fibers                                                  |
| 28365 | 27838 | phage tail fibers                                                  |
| 29157 | 28369 | phage tail fibers                                                  |
| 34554 | 33853 | phage tail fiber protein                                           |
| 35162 | 34602 | phage DNA invertase                                                |
| 35290 | 35571 | phage protein                                                      |
| 35639 | 35968 | phage protein                                                      |
| 35965 | 36408 | <i>lydB</i>                                                        |
| 36395 | 36997 | <i>hdf</i>                                                         |
| 36999 | 38918 | <i>darA</i>                                                        |
| 38915 | 39280 | <i>ddrA</i>                                                        |
| 39317 | 42280 | phage protein                                                      |
| 42270 | 42578 | <i>hxr</i>                                                         |
| 44906 | 44112 | phage protein                                                      |
| 45766 | 46323 | phage lysin, 1,4-beta-N-acetylmuramidase (EC 3.2.1.17) or lysozyme |
| 46459 | 46635 | putative antiholin                                                 |
| 47634 | 46615 | <i>pro</i>                                                         |
| 49336 | 47627 | phage portal protein                                               |
| 49413 | 56180 | putative DNA methylase                                             |
| 56214 | 56654 | <i>ulx</i>                                                         |
| 56651 | 56899 | modulator protein                                                  |
| 59239 | 58598 | <i>mat</i>                                                         |
| 59989 | 59429 | recombination enhancement function protein                         |

---

|       |       |                                                            |
|-------|-------|------------------------------------------------------------|
| 60547 | 60236 | establishment of lysogeny, putative                        |
| 61629 | 60598 | GST-loxP-cre recombinase fusion protein                    |
| 62462 | 62671 | C1 repressor inactivator                                   |
| 62782 | 63633 | C1.100                                                     |
| 65142 | 63658 | phage terminase, large subunit                             |
| 66335 | 65142 | terminase A protein                                        |
| 66873 | 66421 | late promoter-activating protein ( <i>Gp10</i> )           |
| 68212 | 68033 | <i>pdca</i>                                                |
| 68597 | 68217 | death on curing protein, <i>doc</i> toxin                  |
| 75831 | 75325 | 3'-phosphatase, 5'-polynucleotide kinase, phage-associated |
| 77166 | 75904 | <i>pmgS</i>                                                |
| 78169 | 77468 | putative morphogenetic function                            |
| 79466 | 78840 | <i>pmgP</i>                                                |
| 80123 | 79968 | putative morphogenetic function                            |
| 80768 | 80190 | phage protein                                              |
| 81016 | 80771 | <i>pmgL</i>                                                |
| 81163 | 81540 | phage protein                                              |
| 81550 | 82767 | phage protein                                              |
| 82771 | 83499 | phage protein                                              |
| 83486 | 84271 | baseplate or tail stability                                |
| 84273 | 85289 | <i>gp6</i>                                                 |
| 85282 | 85914 | phage baseplate hub                                        |
| 86959 | 85961 | phage protein                                              |
| 93487 | 91520 | methyl-directed repair DNA adenine methylase (EC 2.1.1.72) |
| 94440 | 93535 | DNA recombination-dependent growth factor C                |
| 94717 | 94433 | phage protein                                              |
| 94992 | 95171 | phage protein                                              |
| 95180 | 95968 | <i>upfB</i>                                                |
| 96008 | 96430 | phage outer membrane lytic protein Rz                      |
| 96465 | 96596 | phage outer membrane lipoprotein Rz1                       |
| 96608 | 97000 | <i>upfA</i>                                                |

---

28

29

30

31

32
